# Supplementary material
Source: PubMed Central journal article supplement (PMC11385778)
Supplement: NIHMS2003447-supplement-eTable_1_and_2.pdf [file NIHMS2003447-supplement-eTable_1_and_2.pdf]

## Supplemental Online Content

O'Sullivan CC, Clarke R, Goetz MP, Robertson J. Cyclin-dependent kinase 4/6 inhibitors for treatment of hormone receptor–positive, ERBB2-negative breast cancer: a review. *JAMA Oncol*. Published online June 29, 2023. doi:10.1001/jamaoncol.2023.2000

**eTable 1:** Post-Progression Treatments received by patients with HR+ HER2-MBC who participated in the seminal 1L and 2L CDK4/6i trials

**eTable 2:** Hazard Ratios for Overall Survival for Asian vs. Non-Asian Patients Across the CDK4/6i HR+ HER2- Metastatic Breast Cancer Trials in the 1st line metastatic setting

This supplemental material has been provided by the authors to give readers additional information about their work.

**eTable 1: Post-Progression Treatments received by patients with HR+ HER2-MBC who participated in the seminal 1L and 2L CDK4/6i trials**

| <b>Trial</b>                                                                | <b>CDK4/6i &amp; ET</b>                                  | <b>Study Phase &amp; Line of Treatment</b> | <b>Patient Population</b> | <b>Post Progression Therapy</b>                                                                                                                                                                                                                                                                                         |
|-----------------------------------------------------------------------------|----------------------------------------------------------|--------------------------------------------|---------------------------|-------------------------------------------------------------------------------------------------------------------------------------------------------------------------------------------------------------------------------------------------------------------------------------------------------------------------|
| PALOMA 1<br><br>Ref: Finn et al., <i>Cancer Res</i> (2016)                  | Palbociclib (P)<br><br>Letrozole (L)                     | II; 1L                                     | Postmenopausal women      | 50% pts in P+L arm vs. 64% in L arm received ET.<br><br>60% pts in P+L arm vs. 66% in L arm received CT.                                                                                                                                                                                                                |
| PALOMA 2<br><br>Ref: Rugo et al., <i>Breast Cancer Res and Treat</i> (2019) | Palbociclib (P)<br><br>Letrozole (L)                     | III;1L                                     | Postmenopausal women      | P+ L delayed initiation of 1 <sup>ST</sup> subsequent CT.<br><br>ET: most common 1 <sup>ST</sup> PDT in pts on P+L vs. PL + L (60.8% and 58.0%, respectively), followed by CT (36.6% and 34.0%)                                                                                                                         |
| MONARCH 3<br><br>Ref: Johnston et al. <i>NPJ Breast Cancer</i> 2021.        | Abemaciclib (Ab)<br><br>Anastrozole (A) or Letrozole (L) | III;1L                                     | Postmenopausal women      | Most received ET as 1 <sup>st</sup> PDT (n = 132, 40.2% in Ab arm vs n = 88, 53.3% in PL arm), followed by CT (n = 39, 11.9%) in Ab arm vs n = 30, 18.2% in PL arm), targeted therapy (n = 35, 10.7% in Ab arm vs n = 32, 19.4% in PL arm), and other therapies (n = 13, 4.0% in Ab arm vs n = 13, 7.9% in the PL arm). |

|                                                              |                                                           |        |                                                                                                                                                       |                                                                                                                                                                                                                                                                                                                                    |
|--------------------------------------------------------------|-----------------------------------------------------------|--------|-------------------------------------------------------------------------------------------------------------------------------------------------------|------------------------------------------------------------------------------------------------------------------------------------------------------------------------------------------------------------------------------------------------------------------------------------------------------------------------------------|
|                                                              |                                                           |        |                                                                                                                                                       | F (15.5% in the Ab arm vs 27.9% in the PL arm) and L (11.0% in A arm vs 8.5% in PL arm) were the most common ET administered after progression                                                                                                                                                                                     |
| MONALEESA 2<br>Ref: Blackwell et al., <i>Cancer Res</i> 2018 | Ribociclib ( R )<br><br>Letrozole (L)                     | III;1L | Postmenopausal women                                                                                                                                  | Most common 1 <sup>st</sup> PDT was single-agent ET in 90 (44.3%) vs 87 (35.4%) pts who discontinued R + L vs PL + L.<br><br>CT was the most common 2 <sup>nd</sup> PDT in 20 (9.9%) vs 36 (14.6%) pts. CT alone was the 1 <sup>st</sup> PDT after MONALEESA-2 discontinuation in 32 (15.8%) vs 55 (22.4%) pts on R + L vs PL + L. |
| MONALEESA 7<br>Ref: Lu et al., <i>Clin Cancer Res</i> 2022   | Ribociclib ( R )<br><br>(NSAI; L or A) + goserelin or Tam | III;1L | Pre- and perimenopausal women<br>- Previous ET permitted in (neo)adjuvant setting (CT also permitted in the (neo)adjuvant setting or for advanced BC) | Subsequent antineoplastic therapies following discontinuation balanced between R (77%) and PL (78%) arms.<br><br>Use of CDK4/6i after discontinuation was higher with PL                                                                                                                                                           |

|                                                                     |                                                  |                                           |                                       |                                                                                                                                                                                                                                                                                                                                                                                    |
|---------------------------------------------------------------------|--------------------------------------------------|-------------------------------------------|---------------------------------------|------------------------------------------------------------------------------------------------------------------------------------------------------------------------------------------------------------------------------------------------------------------------------------------------------------------------------------------------------------------------------------|
|                                                                     |                                                  |                                           |                                       | <p>(26%) versus R (13%).</p> <p>Time to 1<sup>ST</sup> CT was significantly delayed with R versus PL.</p>                                                                                                                                                                                                                                                                          |
| <p>PALOMA 3<br/>Ref: Turner et al., Cancer Res 2017</p>             | <p>Palbociclib (P)<br/><br/>Fulvestrant (F)</p>  | <p>III;2L<br/>-2: 1<br/>Randomization</p> | <p>Pre and postmenopausal women</p>   | <p>Most commonly used post progression tx were capecitabine (n=57 [28.8%]), paclitaxel (n=22 [11.1%]), and exemestane (n=34 [17.2%]).</p> <p>Median time to subsequent CT longer with P + F (252 d) vs. PL + F (132 d).</p> <p>Proportionally fewer pts in P + F vs. PL + F arm discontinued next line tx (33% vs 46%), indicating P does not adversely affect efficacy of PDT</p> |
| <p>MONARCH 2<br/>Ref: Neven et al., Breast Cancer Research 2021</p> | <p>Abemaciclib (Ab)<br/><br/>Fulvestrant (F)</p> | <p>III;2L<br/>2:1<br/>Randomization</p>   | <p>-Pre and post Menopausal women</p> | <p>41 (56.9%) pts in Ab +F arm vs. 35 (83.3%) pts in PL+ F arm received PDT.</p> <p>CT received by 60 pts (n = 34, 47.2% vs n = 26, 61.9%) in Ab + F and PL + F</p>                                                                                                                                                                                                                |

|                                                      |                                                  |                                               |                                      |                                                                                                                                                                                                                                                                                                                                                                                                                                                                                                                                                 |
|------------------------------------------------------|--------------------------------------------------|-----------------------------------------------|--------------------------------------|-------------------------------------------------------------------------------------------------------------------------------------------------------------------------------------------------------------------------------------------------------------------------------------------------------------------------------------------------------------------------------------------------------------------------------------------------------------------------------------------------------------------------------------------------|
|                                                      |                                                  |                                               |                                      | <p>arms, respectively,) any time PD.</p> <p>ET received by 48 pts (<i>n</i> = 26, 36.1%) in Ab + F arm vs <i>n</i> = 22, 52.4% in PL+ F arm), while 41 pts received targeted therapy (<i>n</i> = 19, 26.4% in Ab + F arm vs <i>n</i> = 22, 52.4% in PL + F arm), and 17 received other therapies (<i>n</i> = 9, 12.5% pts in Ab + F arm vs <i>n</i> = 8, 19% in PL + F arm).</p> <p>Among those who received targeted therapies, 15 received CDK4/6i(s) as PDT (<i>n</i> = 5, 6.9% pts in A + F arm vs <i>n</i> = 10, 23.8% in PL + F arm).</p> |
| <p>MONALEESA 3<br/>Ref: Slamon et al. JCO, 2021.</p> | <p>Ribociclib ( R )<br/><br/>Fulvestrant (F)</p> | <p>III;2L<br/><br/>-2:1<br/>Randomization</p> | <p>Men and post menopausal women</p> | <p>Among pts who discontinued study tx, 81.9% and 86.4% received PDT, while 14.0% and 30.0% received a CDK4/6i as any subsequent line in the R vs PL arms, respectively.</p>                                                                                                                                                                                                                                                                                                                                                                    |

|          |                                             |                                                 |                                          |                                                                                                                                                                                                   |
|----------|---------------------------------------------|-------------------------------------------------|------------------------------------------|---------------------------------------------------------------------------------------------------------------------------------------------------------------------------------------------------|
|          |                                             |                                                 |                                          | <p>Time to 2<sup>nd</sup> disease progression prolonged- 34.6 months with F to 50.7 with R+ F(HR = 0.64; 95% CI = 0.49–0.84).</p> <p>Time to CT also delayed (HR = 0.57; 95% CI = 0.42–0.79).</p> |
| PALOMA 4 | <p>Palbociclib (P)</p> <p>Letrozole (L)</p> | <p>III; 1L</p> <p>-1:1</p> <p>Randomization</p> | <p>Postmenopausal</p> <p>Asian women</p> | N/A                                                                                                                                                                                               |

Legend: A- anastrozole; Ab- abemaciclib; BC- breast cancer; CT- chemotherapy; ET-endocrine therapy; pts- patients; 1L- 1<sup>st</sup> line; 2L- 2<sup>nd</sup> line; Tx- treatment; NSAI- non-steroidal aromatase inhibitor; TAM- tamoxifen; PD- post discontinuation; PDT- post discontinuation therapy

**eTable 2: Hazard Ratios for Overall Survival for Asian vs. Non-Asian Patients Across the CDK4/6i HR+ HER2- Metastatic Breast Cancer Trials in the 1<sup>st</sup> line metastatic setting**

| <b>Trial</b> | <b>Hazard Ratio<br/>Asian patients</b> | <b>Hazard Ratio<br/>Non-Asian<br/>patients</b> |
|--------------|----------------------------------------|------------------------------------------------|
| PALOMA 1     | unknown                                | 0.9 (overall)                                  |
| PALOMA 2     | 0.48                                   | 0.58                                           |
| MONARCH 3    | 0.30                                   | 0.69                                           |
| MONALEESA 2  | 0.37                                   | 0.614                                          |
| MONALEESA 7  | 0.40                                   | 0.66                                           |
| PALOMA 3     | 0.485                                  | 0.50                                           |
| MONARCH 2    | 0.515                                  | 0.620                                          |
| MONALEESA 3  | 0.30                                   | 0.69                                           |
| PALOMA 4     | 0.68                                   | N/A                                            |
